# Supplementary material for: HACER: an atlas of human active enhancers to interpret regulatory variants
Source: PubMed Central journal article supplement (PMC6323890; doi:10.1093/nar/gky864), 2018-09-24
Supplement: gky864_supplemental_files.pdf [file gky864_supplemental_files.pdf]

# HACER

## Browse

Browse enhancers by cell line

## Query

**SNP:** Search a GWAS risk SNP or eQTL variant to find cell-type-specific enhancers harboring the SNP/variant, and show TF-enhancer-gene interactions.

**Gene:** Search a gene to find cell-type-specific enhancers targeting this gene.

**Coordinate:** Search a genomic region to find cell-type-specific enhancers overlapping this region.

**Batch:** Search a set of genomic regions to obtain an annotation summary on cell-type-specific enhancers, TF-enhancer-target interactions and associated GWAS phenotypes, and to prioritize them based on their annotations.

## Download

Download enhancers by cell line

## Contact

Report new dataset

Submit feed back

**Supplementary Figure S1. Functionality of HACER.** Functionality of HACER includes browse, query, download and contact. The query function provides four ways: SNP-centric, gene-centric, coordinate-centric, and batch query.

**A** Select the cell type(s) you want to browse

**B** Show 10 entries

Search:

| Enhancer_ID      | Chr   | Start     | End       | Closest_Gene | Distance | Technique | CellType | Support        |
|------------------|-------|-----------|-----------|--------------|----------|-----------|----------|----------------|
| AE_hg19_A549_148 | chr10 | 105001817 | 105002606 | OBFC1        | 675439   | GRO-seq   | A549     | ENCODE ChromMM |
| AE_hg19_A549_149 | chr10 | 12375284  | 12376150  | LOC439949    | 5752897  | GRO-seq   | A549     | ENCODE ChromMM |
| AE_hg19_A549_150 | chr10 | 21816756  | 21817957  | ANKRD26      | 5571470  | GRO-seq   | A549     | ENCODE ChromMM |
| AE_hg19_A549_151 | chr10 | 30810921  | 30812280  | MAP3K8       | 87971    | GRO-seq   | A549     | ENCODE ChromMM |
| AE_hg19_A549_152 | chr10 | 32258351  | 32259136  | ZNF438       | 937485   | GRO-seq   | A549     | ENCODE ChromMM |
| AE_hg19_A549_153 | chr10 | 33268114  | 33273526  | NRP1         | 350307   | GRO-seq   | A549     | ENCODE ChromMM |
| AE_hg19_A549_154 | chr10 | 33293368  | 33295381  | NRP1         | 328452   | GRO-seq   | A549     | ENCODE ChromMM |
| AE_hg19_A549_155 | chr10 | 36707052  | 36707369  | FZD8         | 776690   | GRO-seq   | A549     | ENCODE ChromMM |
| AE_hg19_A549_156 | chr10 | 37384531  | 37385441  | FZD8         | 1454169  | GRO-seq   | A549     | ENCODE ChromMM |
| AE_hg19_A549_157 | chr10 | 37782187  | 37782680  | FZD8         | 1851825  | GRO-seq   | A549     | ENCODE ChromMM |

Showing 31 to 40 of 4,232 entries

Previous 1 2 3 4 5 ... 424 Next

**C** Basic TF binding Target genes GWAS eQTL

Name: AE\_hg19\_A549\_154

Cell type: A549

Genome: hg19

Location: chr10:33293368-33295381

Sequence: [Show](#)

Closest active gene (distance): NRP1 (328452bp)

Active gene(s) within 50kb: NA

Source: GSE52935

Support:

VISTA Ensembl Regulatory Build ENCODE Enhancer

**D** Basic TF binding Target genes GWAS eQTL

TFs bound to AE\_hg19\_A549\_154:

Show 10 entries

Search:

| TF      | c_distance | c_score | -log10 c_pvalue  | h_distance | h_score | -log10 h_pvalue  | CellType |
|---------|------------|---------|------------------|------------|---------|------------------|----------|
| ATF3    | 0          | 589     | 3.17580163204829 | 0          | 589     | 3.17580163204829 | A549     |
| BCL3    | 44         | 760     | 3.93130528142167 | 44         | 760     | 3.93130528142167 | A549     |
| BHLHE40 | 18         | 291     | 2.15992092031485 | 18         | 291     | 2.15992092031485 | A549     |
| CEBPB   | 129        | 1000    | 4.63583546331164 | 129        | 1000    | 4.63583546331164 | A549     |
| CREB1   | 60         | 801     | 3.09292890235521 | 60         | 801     | 3.09292890235521 | A549     |
| EP300   | 0          | 1000    | 4.39352255832354 | 0          | 1000    | 4.39352255832354 | A549     |
| ETS1    | 0          | 289     | 3.33931891322614 | 0          | 289     | 3.33931891322614 | A549     |
| FOXP2   | 5          | 1000    | 4.32190887354751 | 5          | 1000    | 4.32190887354751 | A549     |
| GABPA   | 0          | 219     | 2.2504750351821  | 0          | 418     | 3.60927417237851 | A549     |
| NR3C1   | 73         | 366     | 2.70407248251456 | 97         | 1000    | 4.22336612643996 | A549     |

Showing 1 to 10 of 18 entries

Previous 1 2 Next

**E** Basic TF binding Target genes GWAS eQTL

Expression:

Super enhancer(s) (dbSuper):

| dbSUPER_ID | S_chr | S_start  |
|------------|-------|----------|
| SE_28190   | chr10 | 33226424 |
| SE_29371   | chr10 | 33245690 |
| SE_34909   | chr10 | 33268518 |
| SE_36090   | chr10 | 33268491 |

**F** Basic TF binding Target genes GWAS eQTL

GWAS SNPs in AE\_hg19\_A549\_154:

Show 10 entries

| SNPs       | Chr   | Position | PMID     | DISEASE/TRAIT                   | Region   | p-value | OR/Beta |
|------------|-------|----------|----------|---------------------------------|----------|---------|---------|
| rs11009175 | chr10 | 33294775 | 20800221 | Depression (quantitative trait) | 10p11.22 | 5E-6    | 0.16    |

**G** Basic TF binding Target genes GWAS eQTL

eQTLs in AE\_hg19\_A549\_154:

Show 10 entries

Search:

| gene_ID           | gene_Name     | variant_ID          | rs_id_SNP147_GRCh37p13 | tss_Distance | p-value     | Beta      | Tissue/CellType               |
|-------------------|---------------|---------------------|------------------------|--------------|-------------|-----------|-------------------------------|
| ENSG00000216937.7 | CCDC7         | 10_33294775_G_A_b37 | rs11009175             | 559707       | 8.17831e-07 | 0.326073  | Esophagus_Mucosa              |
| ENSG00000216937.7 | CCDC7         | 10_33294775_G_A_b37 | rs11009175             | 559707       | 7.75013e-05 | 0.222961  | Nerve_Tibial                  |
| ENSG00000228816.1 | AK3P5         | 10_33293588_C_T_b37 | rs149310852            | 60179        | 4.55801e-05 | 0.899772  | Cells_Transformed_Fibroblasts |
| ENSG00000273038.1 | RP11-479G22.8 | 10_33294775_G_A_b37 | rs11009175             | 115536       | 8.13464e-06 | -0.585437 | Pituitary                     |
| ENSG00000273038.1 | RP11-479G22.8 | 10_33294775_G_A_b37 | rs11009175             | 115536       | 1.06391e-05 | -0.303228 | Artery_Aorta                  |
| ENSG00000273038.1 | RP11-479G22.8 | 10_33293588_C_T_b37 | rs149310852            | 115349       | 2.35594e-05 | -0.510712 | Adipose_Visceral_Omentum      |
| ENSG00000273038.1 | RP11-479G22.8 | 10_33294775_G_A_b37 | rs11009175             | 115536       | 5.73217e-06 | -0.312524 | Thyroid                       |
| ENSG00000273038.1 | RP11-479G22.8 | 10_33294775_G_A_b37 | rs11009175             | 115536       | 2.17036e-05 | -0.323242 | Cells_Transformed_Fibroblasts |
| ENSG00000273038.1 | RP11-479G22.8 | 10_33294786_C_G_b37 | rs111743079            | 115547       | 1.62351e-06 | -0.669272 | Heart_Left_Ventricle          |
| ENSG00000273038.1 | RP11-479G22.8 | 10_33293841_C_A_b37 | rs143448150            | 115602       | 6.88349e-06 | -0.505891 | Heart_Left_Ventricle          |

Showing 1 to 10 of 15 entries

Previous 1 2 Next

**E** Basic TF binding Target genes GWAS eQTL

AE\_hg19\_A549\_154's target genes:

Show 10 entries

Search:

| Gene     | Cell/Tissue | Detection Method | PMID     |
|----------|-------------|------------------|----------|
| C10orf68 | IMR90       | 4DGenome: Hi-C   | 24141950 |
| ITGB1    | IMR90       | 4DGenome: Hi-C   | 24141950 |

**Supplementary Figure S2. Screenshot of browsing HACER.** (A) Select the cell type for browsing. (B) List of enhancers in the cell type. (C-G) Detailed information of a selected enhancer, including basic information (C), TF binding (D), target genes (E), NHGRI-EBI GWAS SNP hits (F), and GTEx eQTL traits (G).

SNP Gene Coordinate Batch

Interpret GWAS risk SNPs or eQTL variants by exploring enhancer function:

SNP (rsID):  e.g.: rs614367 Type:

Active in Cell:  e.g.: MCF7 Chromatin Interaction in Cell/Tissue:  e.g.: MCF7

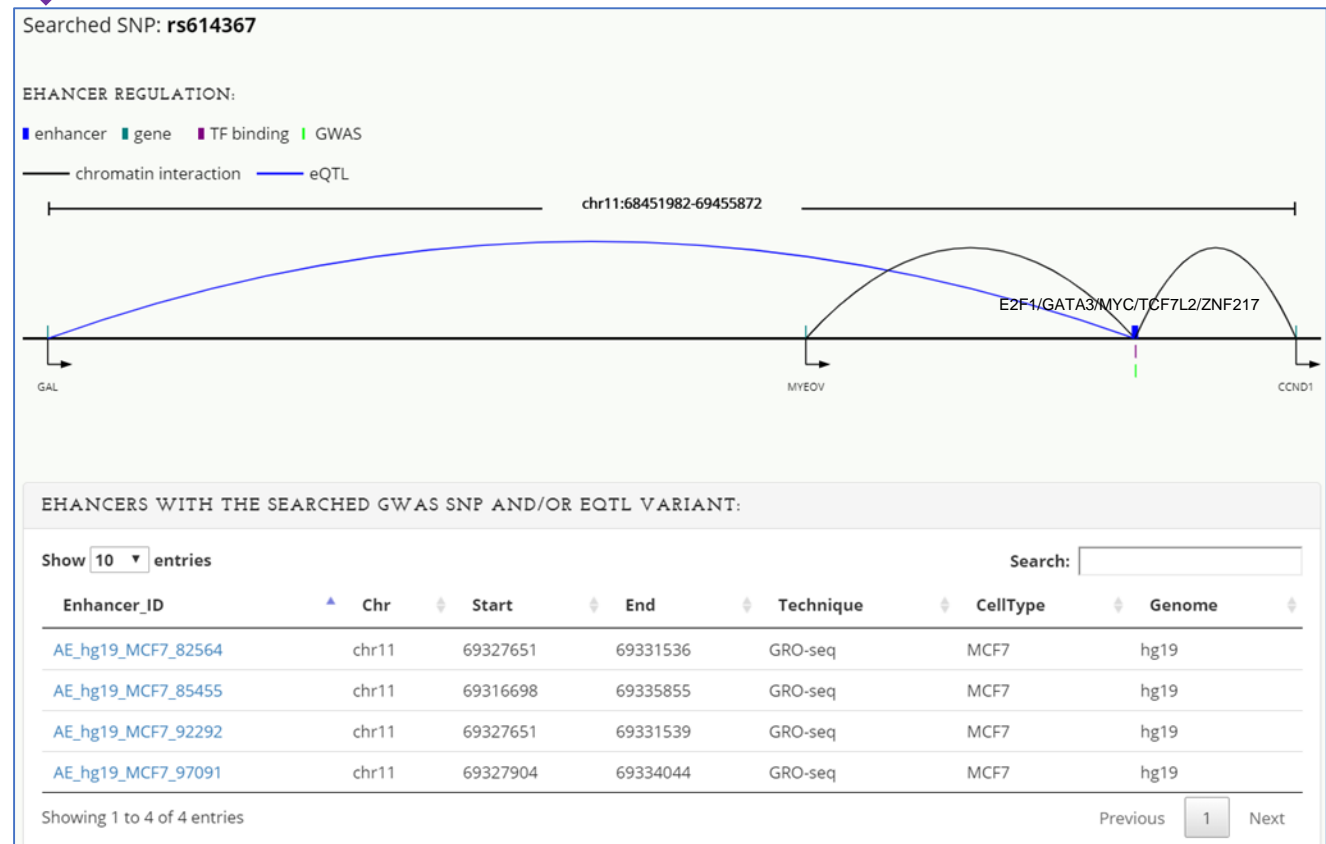

**Supplementary Figure S3. An example of interpreting the association of SNP rs614367 with breast cancer risk.** (A) Query HACER by SNP rs614367 in MCF7 cell line. (B) Enhancer-mediated regulatory network, which shows enhancers (blue) harbouring the SNP (lime), their upstream TF binding (purple) and downstream targeted genes (teal). Enhancer-gene interactions are denoted by black lines if experimentally validated or blue lines if predicted from eQTL analysis.

Searched gene: **MYC**

**A**

EHANCER REGULATION:

■ searched gene ■ enhancer ■ enhancer longer than 12.5kb ■ TF binding ■ GWAS

— chromatin interaction — eQTL

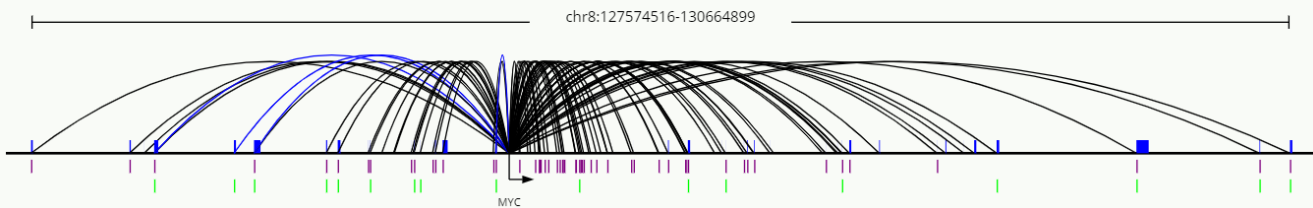

Searched gene: **MYC**

**HCT116**

**B**

EHANCER REGULATION:

■ searched gene ■ enhancer ■ enhancer longer than 12.5kb ■ TF binding ■ GWAS

— chromatin interaction — eQTL

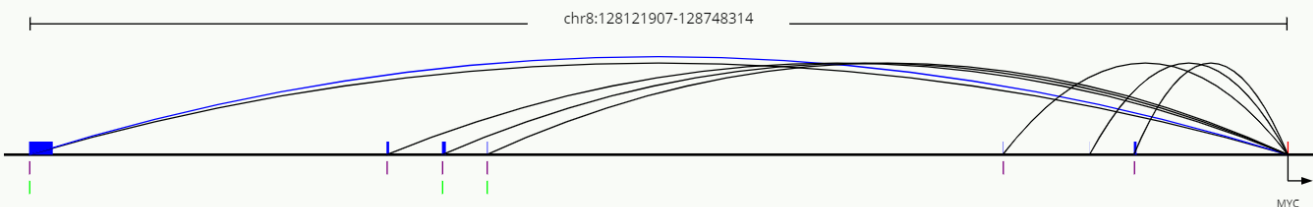

Searched gene: **MYC**

**K562**

**C**

EHANCER REGULATION:

■ searched gene ■ enhancer ■ enhancer longer than 12.5kb ■ TF binding ■ GWAS

— chromatin interaction — eQTL

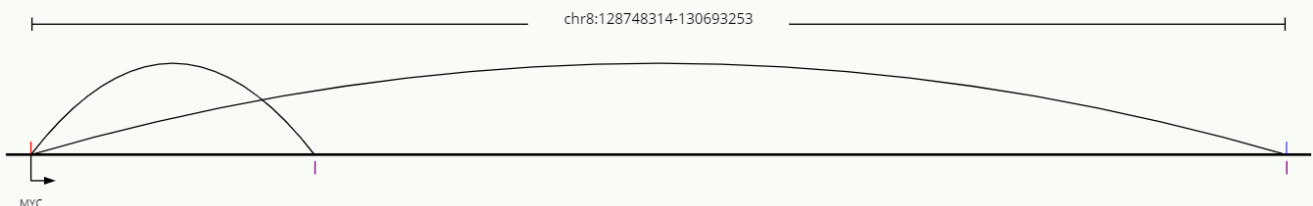

**Supplementary Figure S4. An example of exploring tumor-specific enhancers targeting MYC.** Query HACER by MYC gene in all cells (A), only in HCT116 cell (B) or in K562 cell (C). Enhancers (light blue or blue boxes) targeting MYC, along with their upstream TF binding (purple) and GWAS risk SNP (lime) are shown. Enhancer-MYC interactions are denoted by black lines if experimentally validated or blue lines if predicted from eQTL analysis.

**A**

**SNP Gene Coordinate Batch**

Enter a set of coordinates.

Paste/type coordinates here in bed format: [Example](#)

```
chr1 118365342 118365655
chr11 69328760 69328765
chr11 123361396 123361399
chr1 147804813 147804813
chr4 171704537 171710240
```

Enter a set of target genes to limit query results (optional).

Paste/type gene names here (one gene per line): [Example](#)

```
CCND1
```

**B**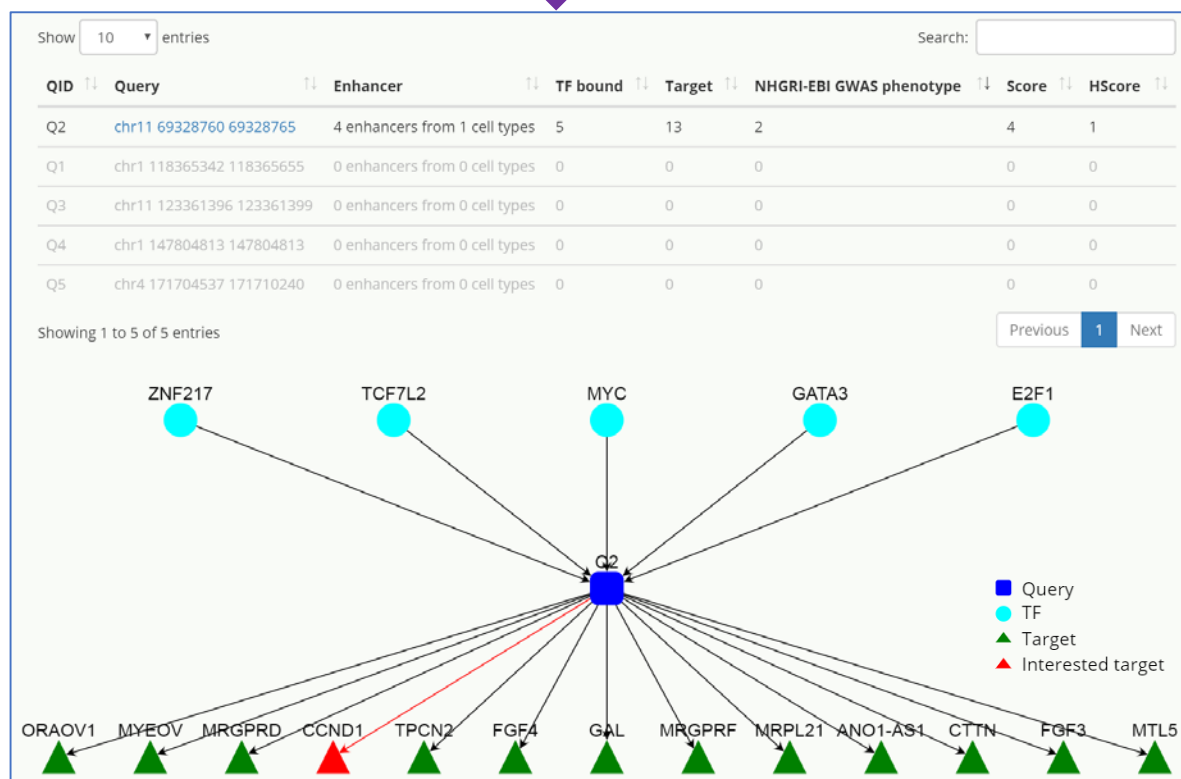

**Supplementary Figure S5. An example for prioritizing/annotating non-coding variants/enhancers.**

(A) Query HACER by a set of coordinates (locations of enhancer or non-coding variants) and a set of target genes. (B) Queries can be ranked by the number of available functional evidence (Score) or by the number of target genes of interest (HScore) (top panel). A network is provided to show upstream TFs (cyan circle) and downstream targets (green triangle) of queries (blue rectangle) with interactions and genes of interest highlighted in red.(bottom panel).
